# Supplementary material
Source: MDPI journal article supplement (https://www.mdpi.com/2076-3417/12/14/7169)
Supplement: s1 [file s1]

*Supplementary information*

*Article*

# Effect of Nitrogen Atoms in the CNT Structure on the Gas Sensing Properties of PANI/CNT Composite

Ivan A. Lobov<sup>1</sup>, Nadim A. Davletkildeev<sup>1</sup>, Sergey N. Nesov<sup>1</sup>, Denis V. Sokolov<sup>1</sup>, Petr M. Korusenko<sup>2,\*</sup>

<sup>1</sup> Laboratory of Physics of Nanomaterials and Heterostructures, Omsk Scientific Center of SB RAS, 15 Karl Marx prosp., 644024 Omsk, Russia

<sup>2</sup> Department of Physics, Omsk State Technical University, 11 Mira prosp., 644050 Omsk, Russia

\* Correspondence: pmkorusenko@omgtu.ru, Tel.: +7(381-2) 37-17-36

## Abbreviations and parameters

1. PANI/uCNT – Composites of polyaniline with undoped carbon nanotubes.
2. PANI/N-CNT - Composites of polyaniline with nitrogen doped (2at.%) carbon nanotubes.
3. PANI/N<sup>+</sup>-CNT - Composites of polyaniline with nitrogen doped (4at.%) carbon nanotubes.

## Fourier-transform infrared spectroscopy

The FTIR transmission spectra of the samples were measured using a VERTEX 70 FTIR spectrometer (Bruker).

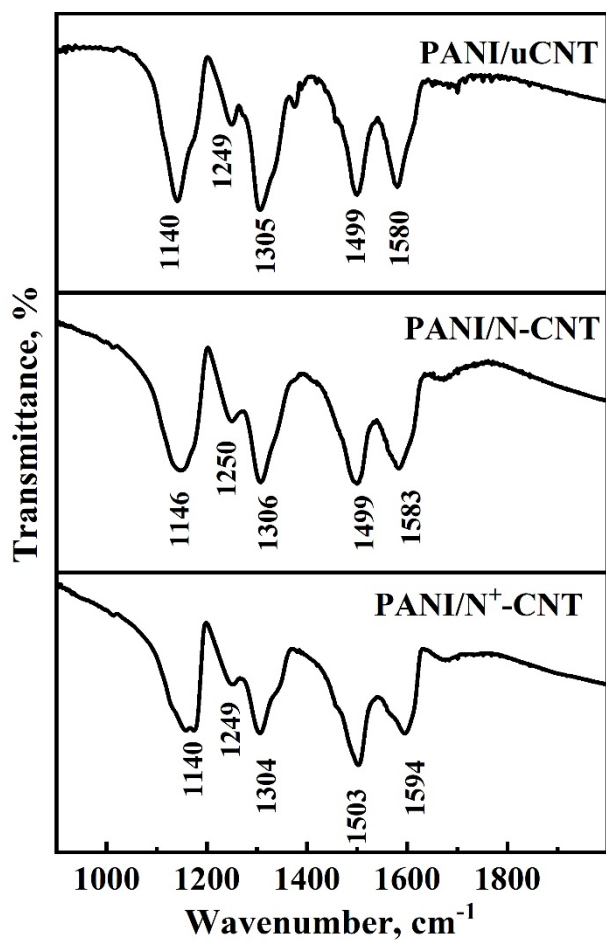

**Figure S1.** FTIR transmission spectra of PANI/uCNT, PANI/N-CNT and PANI/N<sup>+</sup>-CNT.

| Wavenumber, cm <sup>-1</sup> | Assignment                                                                                                                                                               |
|------------------------------|--------------------------------------------------------------------------------------------------------------------------------------------------------------------------|
| 1590                         | C=C quinonoid (Q) ring stretching                                                                                                                                        |
| 1500                         | C=C benzenoid (B) ring stretching                                                                                                                                        |
| 1300                         | C-N stretching vibrations                                                                                                                                                |
| 1250                         | C-N <sup>+</sup> stretching vibration n in the polaron structure                                                                                                         |
| 1100-1140                    | C-H plane bending vibration (modes of N=Q=N, Q=NH <sup>+</sup> B and B-NH <sup>+</sup> -B) and aromatic C-H bending in the plane for the 1,4-disubstituted aromatic ring |

## Time characteristics of gas sensing measurements

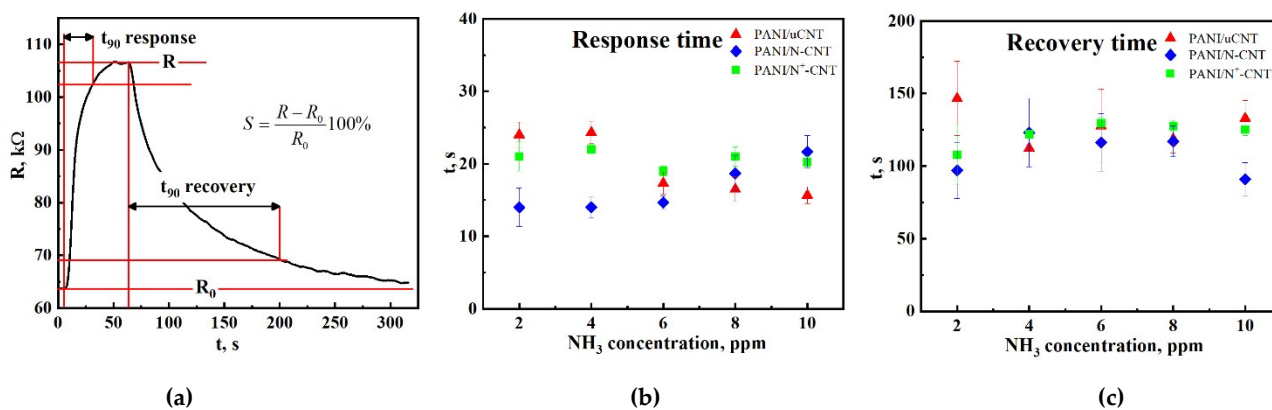

**Figure S2.** Scheme for determining the timing characteristics of gas tests (a); response (b) and recovery (c) time of PANI/uCNT, PANI/N-CNT and PANI/N<sup>+</sup>-CNT nanostructures.
